# Supplementary material for: rRNA expansion segment 27Lb modulates the factor recruitment capacity of the yeast ribosome and shapes the proteome
Source: PubMed Central journal article supplement (PMC7102955; doi:10.1093/nar/gkaa003), 2020-01-21
Supplement: gkaa003_supplemental_file.pdf [file gkaa003_supplemental_file.pdf]

# Supplementary Data

## **rRNA expansion segment 27Lb modulates the factor recruitment capacity of the yeast ribosome and shapes the proteome**

Vaishnavi Shankar<sup>1,2,#,†</sup>, Robert Rauscher<sup>1,†</sup>, Julia Reuther<sup>1</sup>, Walid H. Gharib<sup>3</sup>, Miriam Koch<sup>1</sup> and Norbert Polacek<sup>1\*</sup>

<sup>1</sup>Department of Chemistry and Biochemistry, University of Bern, Freiestrasse 3, 3012 Bern, Switzerland

<sup>2</sup>Graduate School for Cellular and Biomedical Sciences, University of Bern, Bern, Switzerland

<sup>3</sup>Interfaculty Bioinformatics Unit, University of Bern, Baltzerstrasse 6, 3012 Bern, Switzerland

#current address: Department of Microbiology and Molecular Medicine, University of Pittsburgh, 543 Bridgeside Point II 450 Technology Dr. Pittsburgh, PA 15219, USA

†The authors wish it to be known that, in their opinion, these two authors should be regarded as Joint First Authors.

\*To whom correspondence should be addressed:

[norbert.polacek@dcb.unibe.ch](mailto:norbert.polacek@dcb.unibe.ch)

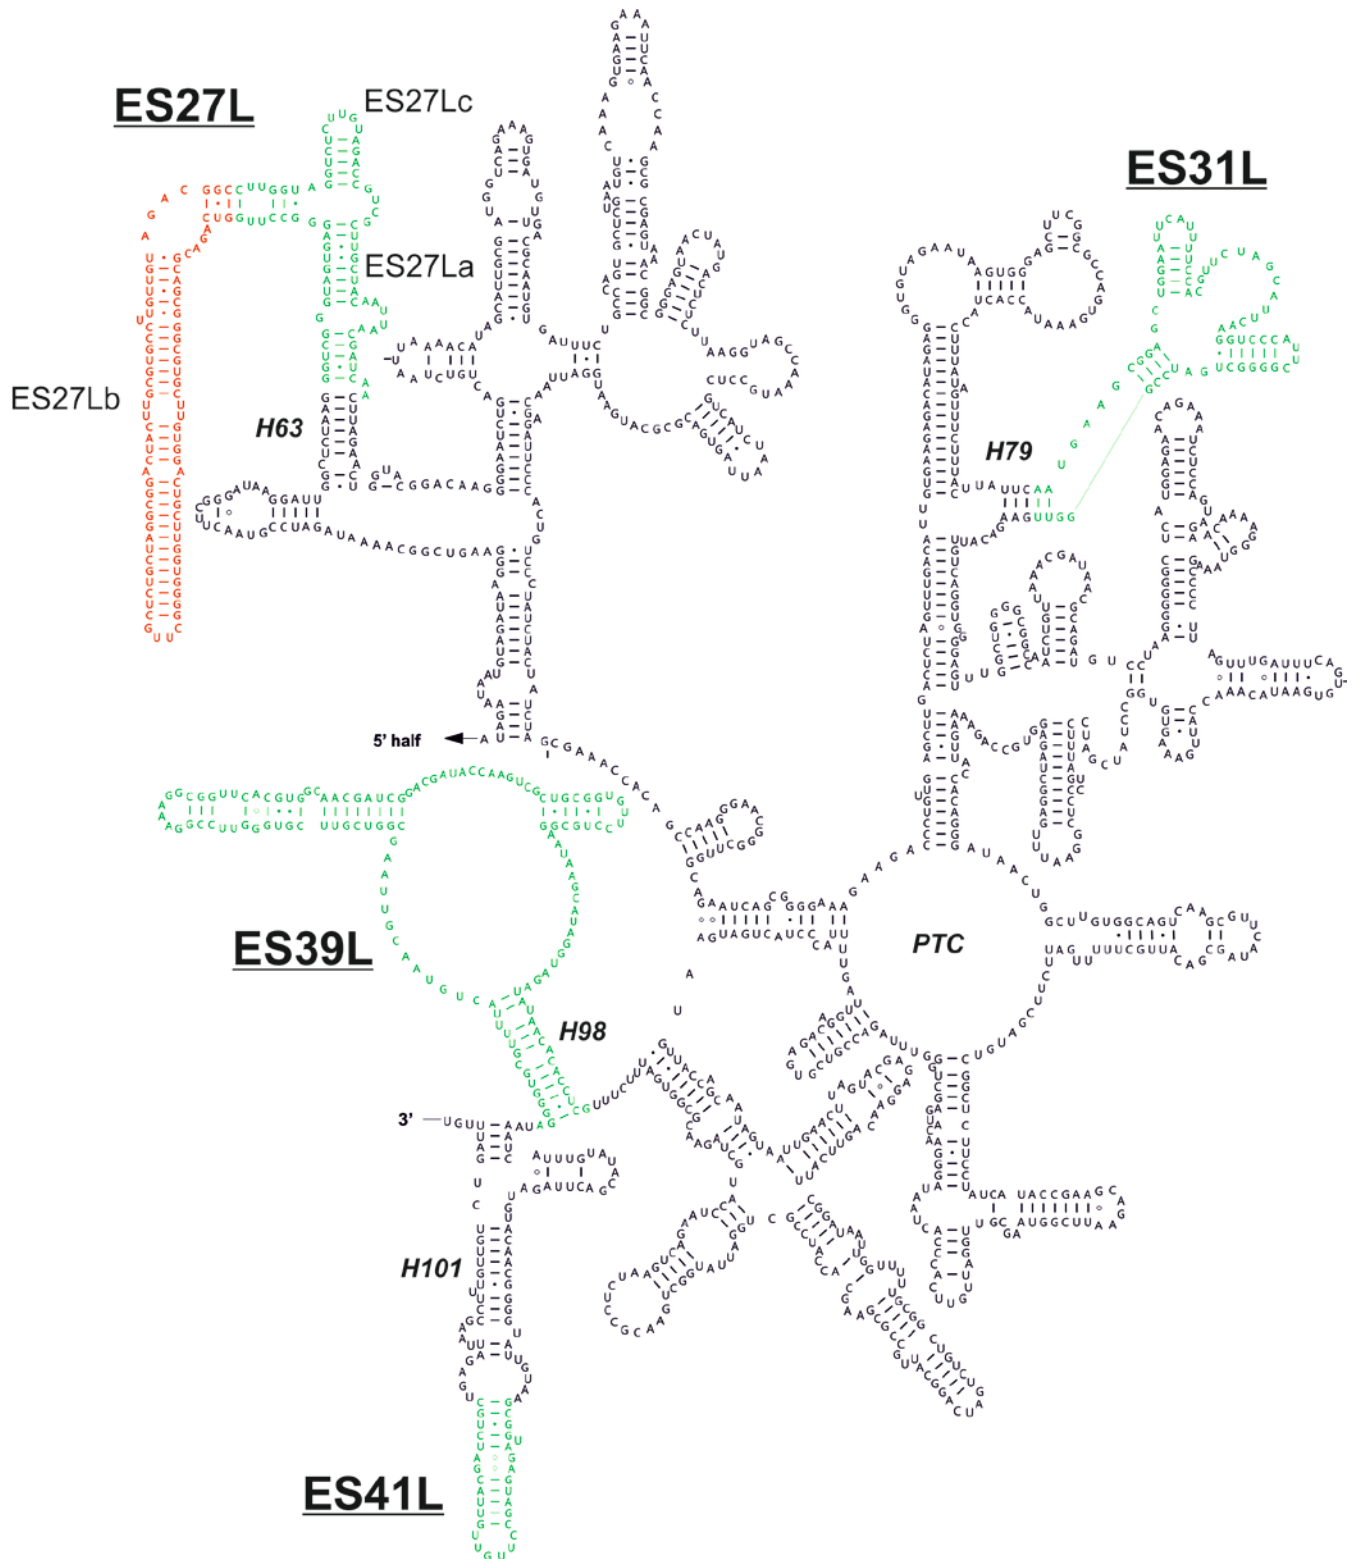

**Supplementary Figure S1:** Secondary structure of the 3'-half of *S. cerevisiae* 25S rRNA. The four ES in the 3'-half of 25S rRNA are labeled in green and the corresponding rRNA helix is indicated. The b-arm of ES27L, which was deleted in this study, is highlighted in red. PTC denotes the location of the peptidyl transferase center.

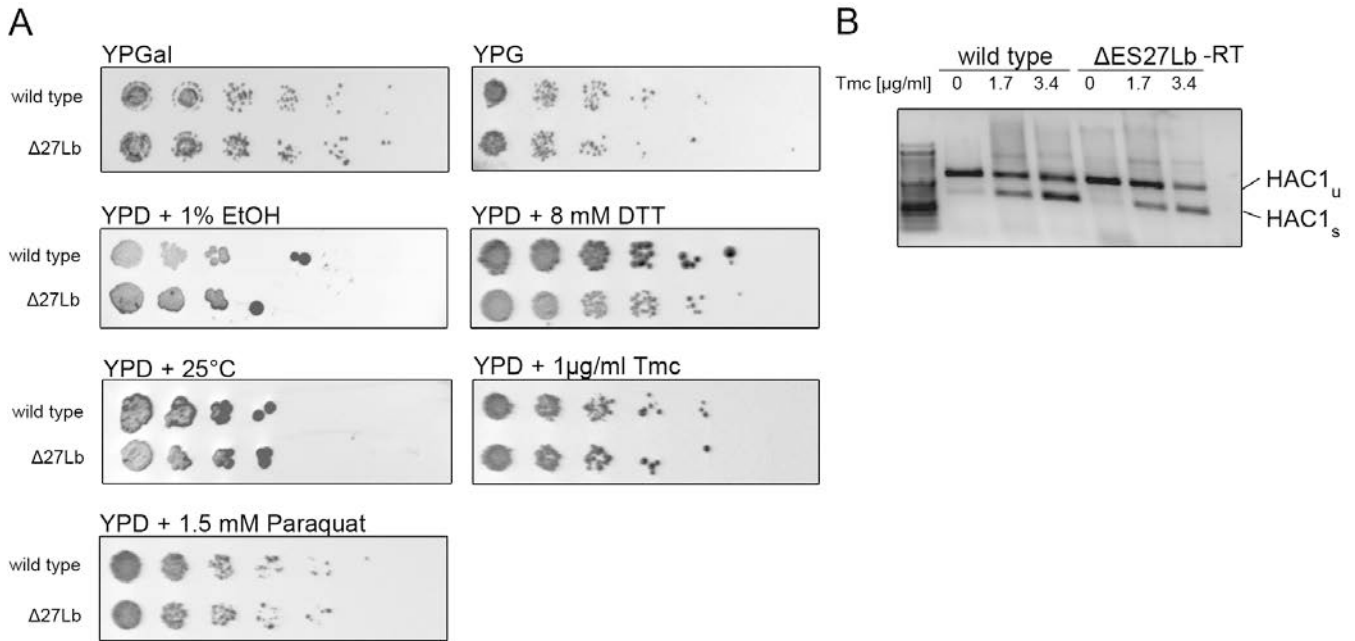

**Supplementary Figure S2:** Intrinsic ER stress response in the  $\Delta$ ES27Lb strain. **(A)** Cells were diluted to  $OD_{600} = 0.1$  and spotted (serial dilutions of 1/10) on to agar plates containing the indicated compounds. If not stated otherwise plates were incubated at 30°C. **(B)** Wildtype and  $\Delta$ 27Lb yeast were incubated with increasing amounts of the ER-stress inducing drug tunicamycin (Tmc). HAC1 splicing was assayed by RT-PCR with primers amplifying the spliced region. -RT indicates a negative control without reverse transcription. No difference in the ration between unspliced (HAC1<sub>u</sub>) and spliced (HAC1<sub>s</sub>) HAC1 mRNA was observed between wildtype and  $\Delta$ ES27Lb cells.

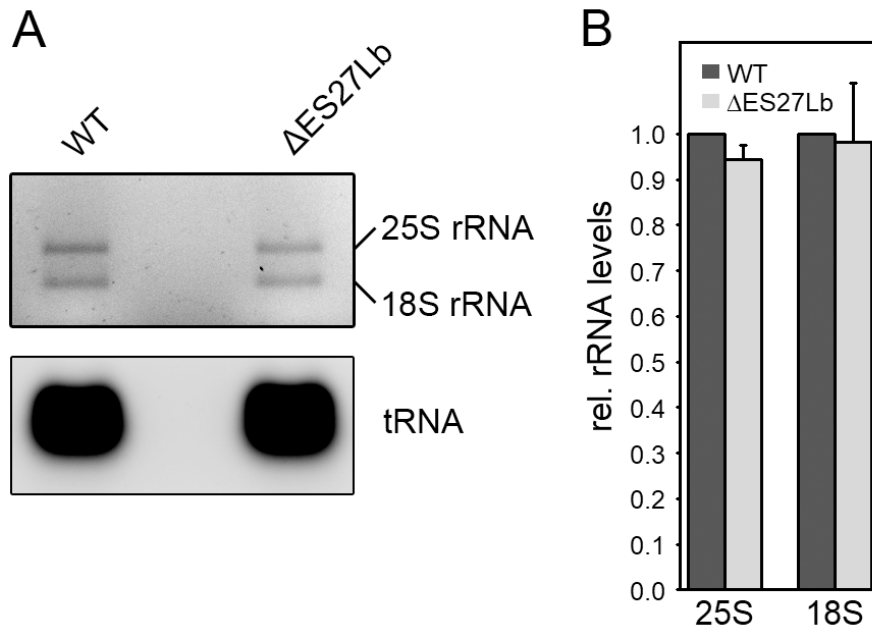

**Supplementary Figure S3:** Levels of mature rRNAs in the wildtype and  $\Delta$ ES27Lb strain. **(A)** Ethidium bromide stained gel showing the mature 18S and 15S rRNA in the wildtype (WT) and in the ES27Lb deletion strain ( $\Delta$ ES27Lb). tRNA bands serve as loading control. **(B)** Quantification of 18S and 25S rRNA levels from four biological replicates (mean and standard deviations are shown).

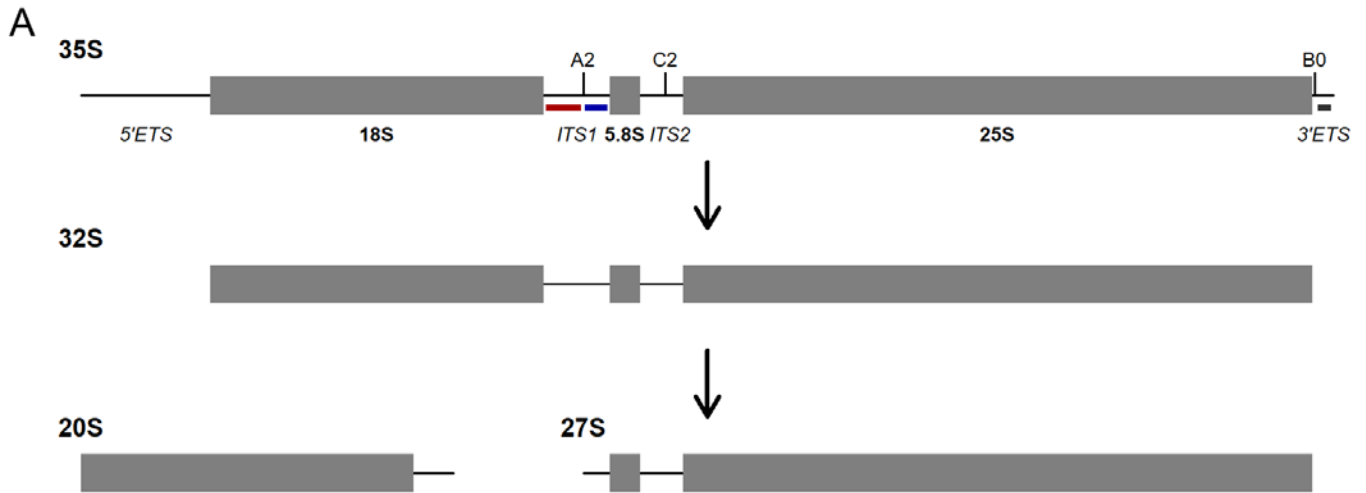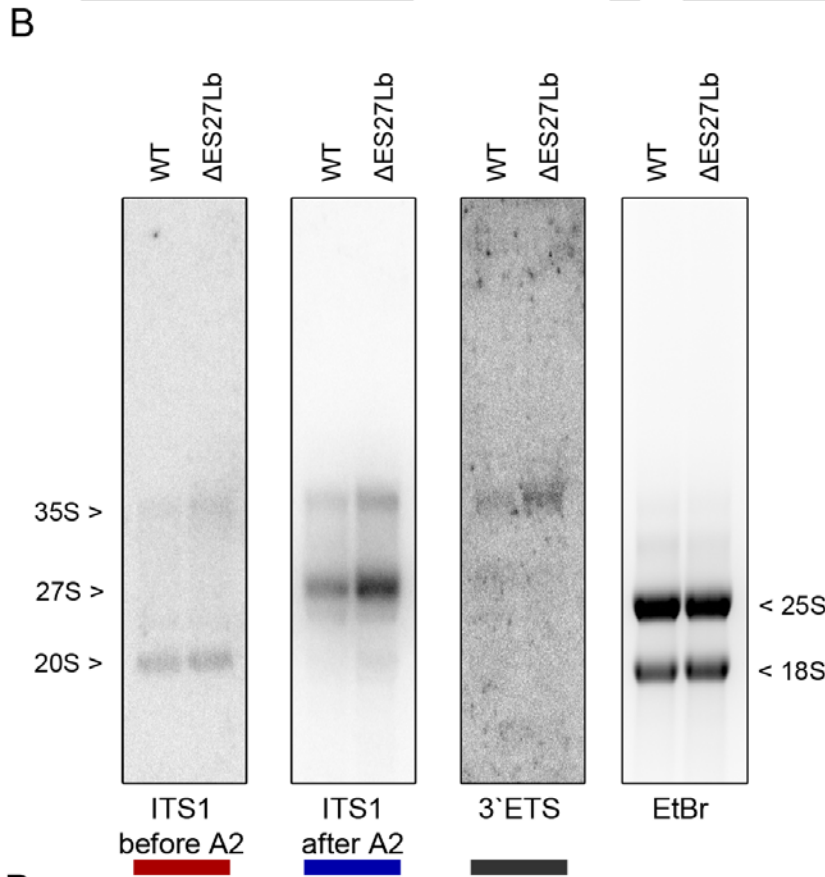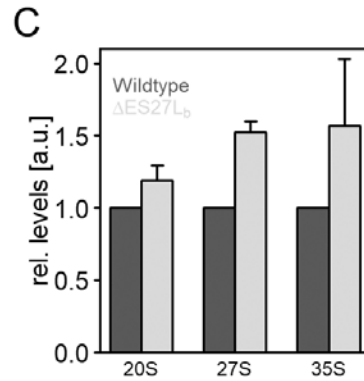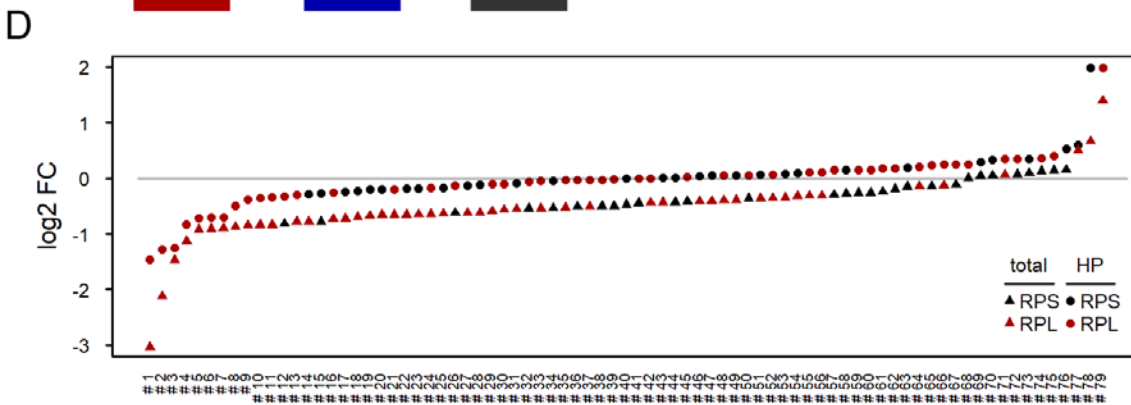

**Supplementary Figure S4:** rRNA maturation and ribosomal protein levels. **(A)** Schematic representation of the rDNA gene. Boxes show rRNA present in mature ribosomes and lines indicate pre-rRNA regions removed during processing (ETS: external transcribed spacer, ITS: internal transcribed spacer). The red, blue and grey bars indicate the positions of the probes used to detect specific processing intermediates. **(B)** Total RNA from wildtype and two  $\Delta$ 27Lb clones separated on denaturing gels and used for northern blot analysis employing the indicated northern blot probes, capable of detecting the presence of 35S, 27S and 20S precursor rRNA transcripts. The ethidium bromide stained gel (right) showing 18S rRNA and 25S rRNA before transfer serves as loading control. **(C)** Quantification of the 20S, 27S and 35S precursor RNA obtained in the DES27Lb strain compared to the wildtype cells (set to 1.0). The mean and standard deviations of three independent experiments is shown. **(D)** Ribosomal proteins (RP) were quantified by mass spectrometry in whole cell lysates (total; triangles) and in heavy polysomes (HP; dots) after sucrose density centrifugation (active translating ribosomes; red). Ribosomal proteins from the large (RPL) and small (RPS) subunit are depicted in red and black, respectively. Changes of RP abundance were quantified using Max Quant and  $\log_2$ -fold changes between wildtype and  $\Delta$ ES27Lb cells were plotted. Fold-changes were ordered by their magnitude for each dataset plotted.

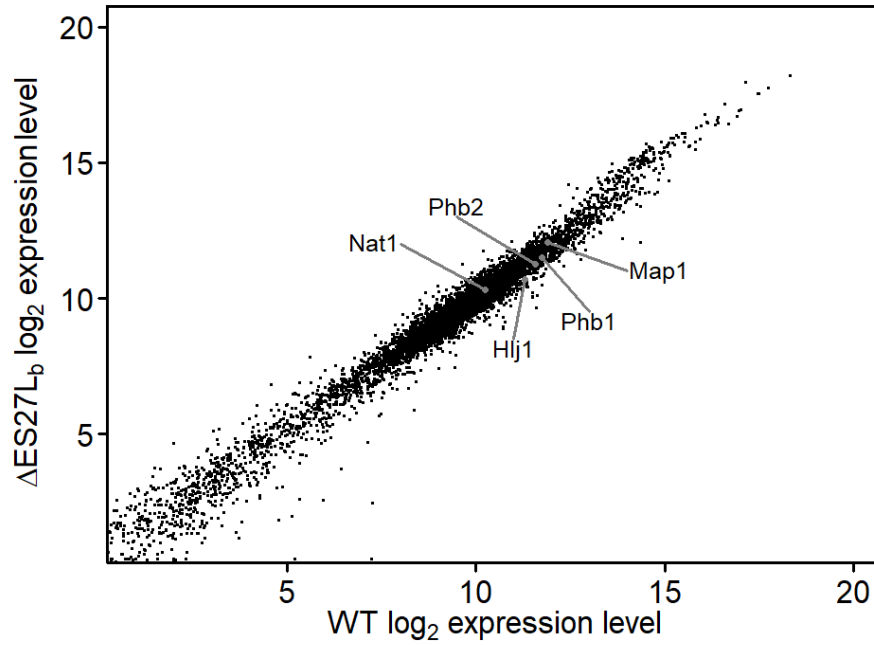

**Supplementary Figure S5:** Whole mRNA transcriptome comparison. Total mRNA expression was quantified by deep sequencing of cDNA libraries derived from exponentially growing wildtype (WT) or  $\Delta$ ES27Lb cells. Counts were normalized using DESeq with standard parameters and plotted on log<sub>2</sub> scale. The highlighted mRNA transcripts depict those genes further investigated in aggregation assays.

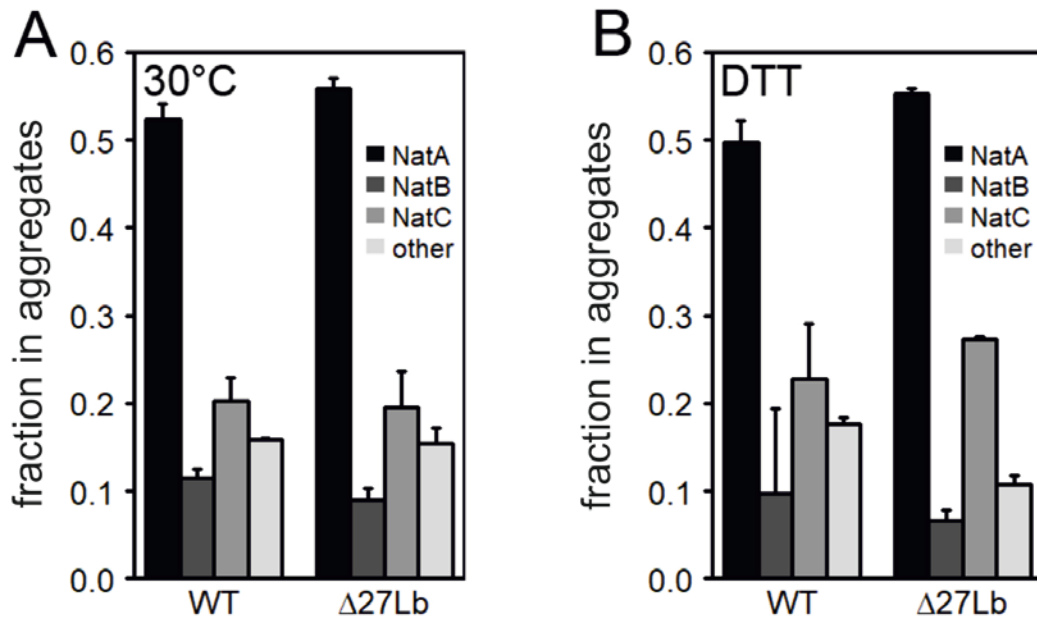

**Supplementary Figure S6:** Nat-complex target composition of specifically aggregated proteins. Proteins that specifically aggregated in either wildtype (WT) or  $\Delta$ ES27Lb cells were sorted according to their first amino acid and subsequently attributed to the Nat complex with specificity for that amino acid. The ratio for each group over total number of proteins was calculated and is presented as fraction of aggregates. Aggregates derived from cells grown under normal conditions (**A**) or 8 mM DTT stress (**B**) were compared (n = 2, data shown as mean  $\pm$ SD).



## Supplementary Table S1

### qRT-PCR primers

|                             |                            |
|-----------------------------|----------------------------|
| S.c.-SBP1 F-2 <sup>nd</sup> | GTCAGCGTAGAGATCCCAATTA     |
| S.c. SBP1 R-2 <sup>nd</sup> | GCCTCTGAAACCTCCTCTAAA      |
| S.c.-END3 F                 | GTGGCAGTAACGTGCTTTC        |
| S.c.-END3 R                 | GCTTGCAATTCGTGTCTCTTA      |
| S.c.-SEC65 F                | GATAACGCCTAAGGTTGTAAGG     |
| S.c.-SEC65 R                | CCCTTCTCCCTTCCTTATGT       |
| S.c.-NUP53 F                | GAAGCTAGTGCAGGGAGTAA       |
| S.c.-NUP53 R                | TCAACTTGACCCATCCATCT       |
| S.c.-SHP1 F                 | CTGAACCAACCAAGGGTAGTA      |
| S.c.-SHP1 R                 | CCATTTTCATGGTCTTCGTCATC    |
| S.c.-TLG2 F                 | GTGCAGAGAACACGCTATTATT     |
| S.c.-TLG2 R                 | CCCTGGTCAACAACCAAATC       |
| S.c.-SCD6 F                 | GTTCTCAAATGATGCCACC        |
| S.c.-SCD6 R                 | AGCGGTTTCTGTGCGAAGTTGG     |
| S.c.-SIP18 F                | CGCTGAAAAATTACAAGGTAACG    |
| S.c.-SIP18 R                | CGTAAGTCTTCCAATCGTTCCG     |
| 18S-rRNA F                  | AATCATCAAAGAGTCCGAAGACATTG |
| 18S-rRNA R                  | CCTTTACTACATGGTATAACTGTGG  |
| CDC19-F                     | CAGAGGTGACTTGGGTATTG       |
| CDC19-R                     | GGTTGGTCTTGGGTTGTAAG       |
| PGK1-F                      | GGAACACCACCCAAGATAC        |
| PGK1-R                      | GGTGACATCCTTACCCAAC        |

### ES deletion primers

|           |                                           |
|-----------|-------------------------------------------|
| ES27Lbfwd | GTGAGGGCCCTTGGGTAGGTCTCTTGTAGACCGTCGCTTGC |
| ES27Lbrev | GACCTACCCAAGGGCCCTCACTACCCGACCCTTAGAGCC   |

### Northern blot probes

|                    |                         |
|--------------------|-------------------------|
| ITS2 probe (FL185) | GGCCAGCAATTTCAAGTTA     |
| 25S rRNA probe (D) | CTCACCTCTATGACGTCCTGTTC |
| ITS1_1 probe       | CGGTTTTAATTGTCCTA       |
| ITS1_2 probe       | CCAGTTACGAAAATTCTTGTTT  |
| 3'ETS probe        | TCCTGCCAGTACCCACTT      |

### Morgan analysis primer

|                    |                   |
|--------------------|-------------------|
| S.c._Morgan_ES27Lb | TCTACAAGAGACCTACC |
|--------------------|-------------------|

All DNA oligonucleotides used in this study are listed and given in 5' to 3' orientation.

**Supplementary Table S2**

| <b>Whole cell lysate</b>                                |                               |                     |                                                         |                           |                     |
|---------------------------------------------------------|-------------------------------|---------------------|---------------------------------------------------------|---------------------------|---------------------|
| <b>enriched in <math>\Delta</math>ES27L<sub>b</sub></b> |                               |                     | <b>depleted in <math>\Delta</math>ES27L<sub>b</sub></b> |                           |                     |
| <b>GO-Term ID</b>                                       | <b>GO-Term</b>                | <b>Adj. p-value</b> | <b>GO-Term ID</b>                                       | <b>GO-Term</b>            | <b>Adj. p-value</b> |
| 0006355                                                 | regulation of transcription   | 0.284               | 0005773                                                 | vacuole                   | 0.982               |
| 0010008                                                 | endosome membrane             | 0.975               | 0071944                                                 | cell periphery            | 0.988               |
| 000636                                                  | rRNA processing               | 0.676               | 0005886                                                 | plasma membrane           | 0.990               |
| <b>Polysomes</b>                                        |                               |                     |                                                         |                           |                     |
| <b>enriched in <math>\Delta</math>ES27L<sub>b</sub></b> |                               |                     | <b>depleted in <math>\Delta</math>ES27L<sub>b</sub></b> |                           |                     |
| <b>GO-Term ID</b>                                       | <b>GO-Term</b>                | <b>Adj. p-value</b> | <b>GO-Term ID</b>                                       | <b>GO-Term</b>            | <b>Adj. p-value</b> |
| 0005886                                                 | plasma membrane               | 0.163               | <u>0022626</u>                                          | <u>cytosolic ribosome</u> | <u>0.027</u>        |
| 0006621                                                 | protein retention in ER lumen | 0.428               | <u>0031415</u>                                          | <u>NatA complex</u>       | <u>0.015</u>        |
| 0005783                                                 | endoplasmic reticulum         | 0.996               | 0046872                                                 | metal ion binding         | 0.260               |

cytosolic ribosome - 0022626

| <b>Protein ID</b> | <b>Log<sub>2</sub>-foldchange</b> | <b>p-value</b> |
|-------------------|-----------------------------------|----------------|
| Nat1              | -1.26                             | 7.72E-7        |
| Nat5              | -1.62                             | 6.13E-4        |
| Ard1              | -1.04                             | 3.53E-5        |
| Map1              | -7.40                             | 1.11E-4        |

Proteins depleted or enriched in whole cell lysate (upper table) or in the polysomes (actively translating ribosomes; middle table) of  $\Delta$ ES27L<sub>b</sub> cells were subjected to GO term enrichment analysis using the DAVID Annotation and Clustering tool (1,2). For each dataset, the three most enriched GO-terms and their respective significance are listed. Underlined are those GO-terms which were found to be significantly enriched in the datasets. The GO-term “cytosolic ribosome” was further detailed in the lower table. The proteins comprising the list are detailed with their respective log<sub>2</sub>-fold change and the significance of that change as calculated from the MS data using the MaxQuant algorithm (3).

### Supplementary Table S3

| ID        | Gene Name | $\Delta$ ES27Lb<br>log <sub>2</sub> FC<br>(P/T) | WT<br>log <sub>2</sub> FC<br>(P/T) | FC ratio<br>(27Lb/WT) | Description                                                                                                                                                                                                                                                                                                                                                                                                                                                        |
|-----------|-----------|-------------------------------------------------|------------------------------------|-----------------------|--------------------------------------------------------------------------------------------------------------------------------------------------------------------------------------------------------------------------------------------------------------------------------------------------------------------------------------------------------------------------------------------------------------------------------------------------------------------|
| YGR231C   | PHB2      | 0.51                                            | 0.4                                | 1.275                 | Subunit of the prohibitin complex (Phb1p-Phb2p); prohibitin is a 1.2 MDa ring-shaped inner mitochondrial membrane chaperone that stabilizes newly synthesized proteins; determinant of replicative life span; involved in mitochondrial segregation; prohibitin deficiency induces a mitochondrial unfolded protein response (mtUPR)                                                                                                                               |
| YGL130W   | CEG1      | 0.41                                            | 0.32                               | 1.28125               | Guanylyltransferase involved in mRNA 5' capping; subunit of mRNA capping enzyme                                                                                                                                                                                                                                                                                                                                                                                    |
| YMR315W   | YMR315W   | 0.58                                            | 0.45                               | 1.288888889           | Protein with NAD(P) <sup>+</sup> oxidoreductase activity;                                                                                                                                                                                                                                                                                                                                                                                                          |
| YGR086C   | PIL1      | 0.615                                           | 0.464                              | 1.325431034           | Eisosome core component; eisosomes are large immobile cell cortex structures associated with endocytosis; detected in phosphorylated state in mitochondria;                                                                                                                                                                                                                                                                                                        |
| YOL064C   | MET22     | 0.57                                            | 0.43                               | 1.325581395           | Bisphosphate-3'-nucleotidase; involved in salt tolerance and methionine biogenesis;                                                                                                                                                                                                                                                                                                                                                                                |
| YNL100W   | MIC27     | 0.56                                            | 0.42                               | 1.333333333           | Component of the MICOS complex; MICOS (formerly MINOS or MitOS) is a mitochondrial inner membrane complex that extends into the intermembrane space and has a role in the maintenance of crista junctions, inner membrane architecture, and formation of contact sites to the outer membrane;                                                                                                                                                                      |
| YML105C   | SEC65     | 0.71                                            | 0.53                               | 1.339622642           | Subunit of the signal recognition particle (SRP); involved in protein targeting to the ER                                                                                                                                                                                                                                                                                                                                                                          |
| YPR191W   | QCR2      | 0.61                                            | 0.45                               | 1.355555556           | Subunit 2 of ubiquinol cytochrome-c reductase (Complex III)                                                                                                                                                                                                                                                                                                                                                                                                        |
| YGR165W   | MRPS35    | 0.53                                            | 0.39                               | 1.358974359           | Mitochondrial ribosomal protein of the small subunit                                                                                                                                                                                                                                                                                                                                                                                                               |
| YER100W   | UBC6      | 0.59                                            | 0.43                               | 1.372093023           | Ubiquitin-conjugating enzyme involved in ERAD                                                                                                                                                                                                                                                                                                                                                                                                                      |
| YBL091C   | MAP2      | 0.61                                            | 0.44                               | 1.386363636           | Methionine aminopeptidase; catalyzes the cotranslational removal of N-terminal methionine from nascent polypeptides                                                                                                                                                                                                                                                                                                                                                |
| YIL021W   | RPB3      | 0.56                                            | 0.4                                | 1.4                   | RNA polymerase II third largest subunit B44;                                                                                                                                                                                                                                                                                                                                                                                                                       |
| YGL105W   | ARC1      | 0.62                                            | 0.44                               | 1.409090909           | Protein that binds tRNA and methionyl- and glutamyl-tRNA synthetases; involved in tRNA delivery, stimulating catalysis, and ensuring localization;                                                                                                                                                                                                                                                                                                                 |
| YPR107C   | YTH1      | 0.54                                            | 0.38                               | 1.421052632           | Essential RNA-binding component of cleavage and polyadenylation factor                                                                                                                                                                                                                                                                                                                                                                                             |
| YOR298C-A | MBF1      | 0.79                                            | 0.54                               | 1.462962963           | Transcriptional coactivator                                                                                                                                                                                                                                                                                                                                                                                                                                        |
| YLR208W   | SEC13     | 0.615                                           | 0.42                               | 1.464285714           | Structural component of 3 complexes; subunit of the Nup84p nuclear pore subcomplex that contributes to nucleocytoplasmic transport and NPC biogenesis; subunit of the COPII vesicle coat required for ER-to-Golgi transport; subunit of SEACAT, a subcomplex of the coatamer-related, vacuolar-associated SEA complex, that inhibits the TORC1 inhibitory role of SEACIT (Iml1p-Npr2p-Npr3p), a GAP for Gtr1p, thereby resulting in activation of TORC1 signaling; |
| YJL167W   | ERG20     | 0.47                                            | 0.32                               | 1.46875               | Farnesyl pyrophosphate synthetase                                                                                                                                                                                                                                                                                                                                                                                                                                  |
| YOR111W   | YOR111W   | 0.49                                            | 0.33                               | 1.484848485           | Unknown                                                                                                                                                                                                                                                                                                                                                                                                                                                            |
| YOR194C   | TOA1      | 0.58                                            | 0.39                               | 1.487179487           | TFIIA large subunit                                                                                                                                                                                                                                                                                                                                                                                                                                                |
| YMR161W   | HUJ1      | 0.5                                             | 0.33                               | 1.515151515           | Co-chaperone for Hsp40p; anchored in the ER membrane                                                                                                                                                                                                                                                                                                                                                                                                               |
| YDL097C   | RPN6      | 0.61                                            | 0.39                               | 1.564102564           | Essential, non-ATPase regulatory subunit of the 26S proteasome lid; required for the assembly and activity of the 26S proteasome                                                                                                                                                                                                                                                                                                                                   |
| YGL048C   | RPT6      | 0.52                                            | 0.33                               | 1.575757576           | ATPase of the 19S regulatory particle of the 26S proteasome                                                                                                                                                                                                                                                                                                                                                                                                        |
| YKL059C   | MPE1      | 0.54                                            | 0.34                               | 1.588235294           | Essential conserved subunit of CPF cleavage and polyadenylation factor                                                                                                                                                                                                                                                                                                                                                                                             |
| YPL118W   | MRP51     | 0.55                                            | 0.34                               | 1.617647059           | Mitochondrial ribosomal protein of the small subunit                                                                                                                                                                                                                                                                                                                                                                                                               |
| YER027C   | GAL83     | 0.74                                            | 0.44                               | 1.681818182           | One of three possible beta-subunits of the Snf1 kinase complex                                                                                                                                                                                                                                                                                                                                                                                                     |
| YKR055W   | RHO4      | 0.56                                            | 0.33                               | 1.696969697           | Non-essential small GTPase; member of the Rho/Rac subfamily of Ras-like proteins                                                                                                                                                                                                                                                                                                                                                                                   |
| YGL001C   | ERG26     | 0.5                                             | 0.29                               | 1.724137931           | C-3 sterol dehydrogenase; catalyzes the second of three steps required to remove two C-4 methyl groups from an intermediate in ergosterol biosynthesis                                                                                                                                                                                                                                                                                                             |
| YLR418C   | CDC73     | 0.47                                            | 0.27                               | 1.740740741           | Component of the Paf1p complex; binds to and modulates the activity of RNA polymerases I and II                                                                                                                                                                                                                                                                                                                                                                    |
| YGR132C   | PHB1      | 0.54                                            | 0.31                               | 1.741935484           | Subunit of the prohibitin complex (Phb1p-Phb2p)                                                                                                                                                                                                                                                                                                                                                                                                                    |
| YJL081C   | ARP4      | 0.35                                            | 0.2                                | 1.75                  | Nuclear actin-related protein involved in chromatin remodeling; component of chromatin-remodeling enzyme complexes                                                                                                                                                                                                                                                                                                                                                 |
| YOR042W   | CUE5      | 0.62                                            | 0.35                               | 1.771428571           | Ubiquitin-binding protein; functions as ubiquitin-Atg8p adaptor in ubiquitin-dependent autophagy                                                                                                                                                                                                                                                                                                                                                                   |
| YOR158W   | PET123    | 0.72                                            | 0.405                              | 1.777777778           | Mitochondrial ribosomal protein of the small subunit                                                                                                                                                                                                                                                                                                                                                                                                               |
| YNL177C   | MRPL22    | 0.63                                            | 0.34                               | 1.852941176           | Mitochondrial ribosomal protein of the large subunit                                                                                                                                                                                                                                                                                                                                                                                                               |
| YGR178C   | PBP1      | 0.41                                            | 0.22                               | 1.863636364           | Component of glucose deprivation induced stress granules; involved in P-body-dependent granule assembly                                                                                                                                                                                                                                                                                                                                                            |
| YDR322W   | MRPL35    | 0.49                                            | 0.26                               | 1.884615385           | Mitochondrial ribosomal protein of the large subunit                                                                                                                                                                                                                                                                                                                                                                                                               |
| YNL084C   | END3      | 0.53                                            | 0.28                               | 1.892857143           | EH domain-containing protein involved in endocytosis                                                                                                                                                                                                                                                                                                                                                                                                               |
| YJR065C   | ARP3      | 0.53                                            | 0.27                               | 1.962962963           | Essential component of the Arp2/3 complex; Arp2/3 is a highly conserved actin nucleation center required for the motility and integrity of actin patches                                                                                                                                                                                                                                                                                                           |
| YDL236W   | PHO13     | 0.56                                            | 0.28                               | 2                     | Conserved phosphatase acting as a metabolite repair enzyme                                                                                                                                                                                                                                                                                                                                                                                                         |
| YNL173C   | MDG1      | 0.81                                            | 0.4                                | 2.025                 | Plasma membrane protein; involved in G-protein mediated pheromone signaling pathway                                                                                                                                                                                                                                                                                                                                                                                |
| YLR079W   | SIC1      | 0.6                                             | 0.28                               | 2.142857143           | Cyclin-dependent kinase inhibitor (CKI); inhibitor of Cdc28-Clb kinase complexes that controls G1/S phase transition                                                                                                                                                                                                                                                                                                                                               |
| YPL173W   | MRPL40    | 0.54                                            | 0.25                               | 2.16                  | Mitochondrial ribosomal protein of the large subunit                                                                                                                                                                                                                                                                                                                                                                                                               |
| YBL025W   | RRN10     | 0.47                                            | 0.21                               | 2.238095238           | Protein involved in promoting high level transcription of rDNA                                                                                                                                                                                                                                                                                                                                                                                                     |
| YGL082W   | YGL082W   | 0.55                                            | 0.23                               | 2.391304348           | Unknown                                                                                                                                                                                                                                                                                                                                                                                                                                                            |
| YMR153W   | NUP53     | 0.45                                            | 0.18                               | 2.5                   | FG-nucleoporin component of central core of nuclear pore complex (NPC)                                                                                                                                                                                                                                                                                                                                                                                             |
| YBL058W   | SHP1      | 0.64                                            | 0.23                               | 2.782608696           | UBX domain-containing substrate adaptor for Cdc48p; ubiquitin regulatory X domain-containing protein that acts as a substrate recruiting cofactor for Cdc48p                                                                                                                                                                                                                                                                                                       |
| YHL034C   | SBP1      | 0.78                                            | 0.24                               | 3.25                  | Protein that binds eIF4G and has a role in repression of translation; has an RGG motif; found in cytoplasmic P bodies; binds to mRNAs under glucose starvation stress, most often in the 5' UTR                                                                                                                                                                                                                                                                    |
| YOL018C   | TLG2      | 0.41                                            | 0.05                               | 8.2                   | Syntaxin-like t-SNARE; forms a complex with Tlg1p and Vti1p and mediates fusion of endosome-derived vesicles with the late Golgi                                                                                                                                                                                                                                                                                                                                   |

## Supplementary Table S4

| Gene ID   | Name   | 27LbP/T<br>log2fold | WT P/T<br>log2fold | FC Ratio<br>(27Lb/WT) | Description                                                                                                                                      |
|-----------|--------|---------------------|--------------------|-----------------------|--------------------------------------------------------------------------------------------------------------------------------------------------|
| YKR102W   | FLO10  | -0.6752542          | -0.5637328         | 1.197826791           | Member of the FLO family of cell wall flocculation proteins; not expressed in most lab strains                                                   |
| YHR186C   | KOG1   | -0.5883861          | -0.448352          | 1.312330796           | Subunit of TORC1; TORC1 is a rapamycin-sensitive complex involved in growth control                                                              |
| YBR295W   | PCA1   | -0.6911776          | -0.5110215         | 1.352541076           | Cadmium transporting P-type ATPase                                                                                                               |
| YLR247C   | IRC20  | -0.7191879          | -0.5123487         | 1.403707914           | E3 ubiquitin ligase and putative helicase                                                                                                        |
| YKL217W   | JEN1   | -0.7680117          | -0.5415597         | 1.41814765            | Monocarboxylate/proton symporter of the plasma membrane; transport activity is dependent on the pH gradient across the membrane                  |
| YMR185W   | RTP1   | -0.6870615          | -0.4714764         | 1.457255313           | Protein required for the nuclear import and biogenesis of RNA pol II                                                                             |
| YIL013C   | PDR11  | -0.7443784          | -0.4647515         | 1.601669698           | ATP-binding cassette (ABC) transporter; multidrug transporter involved in multiple drug resistance                                               |
| YGR233C   | PHO81  | -0.7564424          | -0.4627779         | 1.63456879            | Cyclin-dependent kinase (CDK) inhibitor                                                                                                          |
| YJR152W   | DAL5   | -0.6697863          | -0.4067318         | 1.646751833           | Allantoate permease; ureidosuccinate permease                                                                                                    |
| YJL129C   | TRK1   | -0.5700405          | -0.3086935         | 1.846623047           | Component of the Trk1p-Trk2p potassium transport system                                                                                          |
| YDR459C   | PFA5   | -0.5263712          | -0.2616384         | 2.011826804           | Palmitoyltransferase with autoacylation activity; likely functions in pathway(s) outside Ras                                                     |
| YDL210W   | UGA4   | -0.8665343          | -0.4299744         | 2.015316142           | GABA (gamma-aminobutyrate) permease; serves as a GABA transport protein; localized to the vacuolar membrane                                      |
| YOR129C   | AFI1   | -0.5632279          | -0.271589          | 2.073824632           | Arf3p polarization-specific docking factor; participates in polarity development and maintenance of a normal haploid budding pattern             |
| YPL258C   | THI21  | -0.6729541          | -0.3172359         | 2.121305175           | Hydroxymethylpyrimidine (HMP) and HMP-phosphate kinase; involved in thiamine biosynthesis                                                        |
| YKR061W   | KTR2   | -0.829721           | -0.3800266         | 2.183323598           | Mannosyltransferase involved in N-linked protein glycosylation                                                                                   |
| YDR039C   | ENA2   | -0.6098759          | -0.2407476         | 2.533258098           | P-type ATPase sodium pump; involved in Na <sup>+</sup> efflux to allow salt tolerance                                                            |
| YAL054C   | ACS1   | -0.7246089          | -0.2628965         | 2.756251496           | Acetyl-coA synthetase isoform; along with Acs2p, acetyl-coA synthetase isoform is the nuclear source of acetyl-coA for histone acetylation       |
| YNL259C   | ATX1   | -0.7906581          | 0.27344691         | 2.891450136           | Cytosolic copper metallochaperone; transports copper to the secretory vesicle copper transporter Ccc2p for eventual insertion into Fet3p         |
| YDR545W   | YRF1-1 | -0.7917505          | -0.246977          | 3.20576616            | Helicase encoded by the Y' element of subtelomeric regions                                                                                       |
| YDL232W   | OST4   | -1.2722695          | -0.3053878         | 4.166078886           | Subunit of the oligosaccharyltransferase complex of the ER lumen                                                                                 |
| YGL126W   | SCS3   | -0.6014253          | -0.1377783         | 4.365165998           | Protein required for inositol prototrophy; required for normal ER membrane biosynthesis;                                                         |
| YKR097W   | PCK1   | -0.780831           | -0.1642859         | 4.752880005           | Phosphoenolpyruvate carboxykinase; key enzyme in gluconeogenesis                                                                                 |
| YIL040W   | APQ12  | -0.588026           | -0.1076528         | 5.462243074           | Nuclear envelope/ER integral membrane protein                                                                                                    |
| YPL096C-A | ERI1   | -1.0406434          | -0.0736271         | 14.13397182           | Endoplasmic reticulum membrane protein that binds and inhibits Ras2p; binds to and inhibits GTP-bound Ras2p at the endoplasmic reticulum (ER)    |
| YPL095C   | EEB1   | -0.6652827          | -0.0443837         | 14.98935817           | Acyl-coenzymeA:ethanol O-acyltransferase; responsible for the major part of medium-chain fatty acid ethyl ester biosynthesis during fermentation |

Lists of mRNAs enriched (Supplementary Table S3) or depleted (Supplementary Table S4) from the polysomal fractions of  $\Delta$ ES27Lb cells along with their description, taken from the SGD (*S. cerevisiae* genome database; ref. 4).

## Supplementary References

1. Huang da, W., Sherman, B.T. and Lempicki, R.A. (2009) Systematic and integrative analysis of large gene lists using DAVID bioinformatics resources. *Nature protocols*, **4**, 44-57.
2. Huang da, W., Sherman, B.T. and Lempicki, R.A. (2009) Bioinformatics enrichment tools: paths toward the comprehensive functional analysis of large gene lists. *Nucleic Acids Res*, **37**, 1-13.
3. Cox, J., Hein, M.Y., Lubner, C.A., Paron, I., Nagaraj, N. and Mann, M. (2014) Accurate proteome-wide label-free quantification by delayed normalization and maximal peptide ratio extraction, termed MaxLFQ. *Molecular & cellular proteomics : MCP*, **13**, 2513-2526.
4. Engel, S.R., Dietrich, F.S., Fisk, D.G., Binkley, G., Balakrishnan, R., Costanzo, M.C., Dwight, S.S., Hitz, B.C., Karra, K., Nash, R.S. *et al.* (2014) The reference genome sequence of *Saccharomyces cerevisiae*: then and now. *G3 (Bethesda)*, **4**, 389-398.
